# Supplementary material for: A handheld continuous-flow real-time fluorescence qPCR system with a PVC microreactor
Source: Royal Society of Chemistry journal article supplement (doi:10.1039/c9an01894h), 2020-01-01
Supplement: c9an01894h1.pdf [file c9an01894h1.pdf]

## Supporting Information

### Handheld Continuous-flow Real-time Fluorescence qPCR System with PVC Microreactor

Bing Shi<sup>a,b</sup>, Yuanming Li<sup>a</sup>, Di Wu<sup>a,b</sup> and Wenming Wu<sup>\*a</sup>

a. State Key Laboratory of Applied Optics, Changchun Institute of Optics, Fine  
Mechanics and Physics (CIOMP), Chinese Academy of Sciences, Changchun, 130033,  
China

b. University of Chinese Academy of Sciences (UCAS), Beijing, 100049, China

**\*Corresponding author:** Wenming Wu

E-mail address: wuwm@ciomp.ac.cn

Tel: 86-131-5975-2917

Fax: 86-431-86708159

## I. Thermal Image of Microreactor

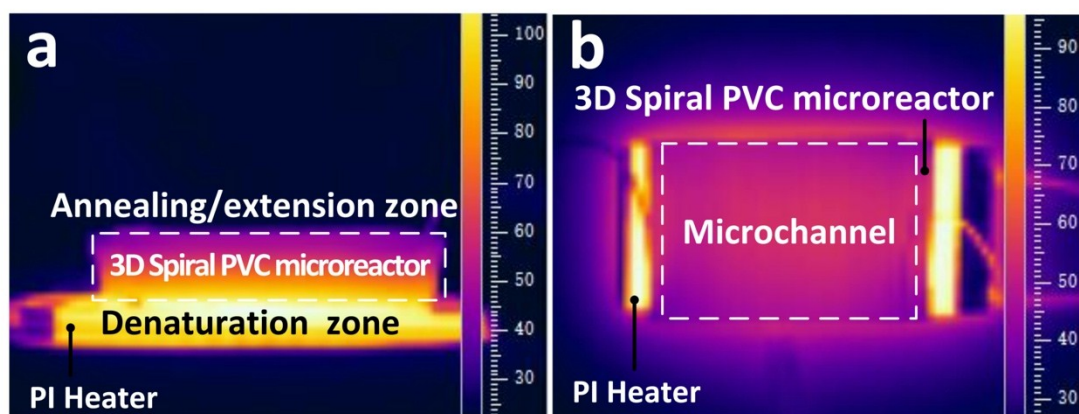

**Fig S1.** The IR camera images of the front and the top views of the microreactor corresponded to the denaturation and annealing/extension temperature which were measured to be  $95 \pm 2$  °C and  $56 \pm 0.2$  °C, respectively. The annealing/extension and denaturation time is 35s and 10s, respectively. Moreover, the annealing/extension temperature can be easily controlled by changing the thickness of the PDMS block, which makes the microreactor a general and flexible platform for performing a flow-through PCR for various samples.

## II. Experimental Methods of Gel Electrophoresis

After the PCR reaction, agarose powder (V900510; Sigma-Aldrich, Shanghai, China), DL2000 DNA marker ( $50 \times 250$   $\mu$ L, Peking Jialan Biotechnology Co., Ltd., Beijing, China),  $0.5 \times$  TBE buffer (PH1755, Phygene, Fuzhou, China), and Nucleic Acid GelStain (KeyGEN BioTECH, Nanjing, China) were applied to analyze the amplification result.
